# Supplementary material
Source: publisher figshare collection journal article supplement (https://acs.figshare.com/ndownloader/files/9660040)
Supplement: Supplementary file 1 [file 9660040]

## Evolution of Graphene Growth on Pt(111): from Carbon Clusters to Graphene

*Hyo Won Kim<sup>†,§,\*</sup>, Wonhee Ko<sup>†,§</sup>, JiYeon Ku<sup>‡</sup>, Yousoo Kim<sup>‡</sup>, Seongjun Park<sup>‡</sup>, Sungwoo Hwang<sup>‡</sup>*

<sup>†</sup> Device Lab, Samsung Advanced Institute of Technology, Suwon 443-803, Korea

<sup>‡</sup> Surface and Interface Science Laboratory, RIKEN, Wako, Saitama 351-0198, Japan

<sup>§</sup> These authors contributed equally to this work.

<sup>\*</sup> E-mail: hyowon98.kim@samsung.com

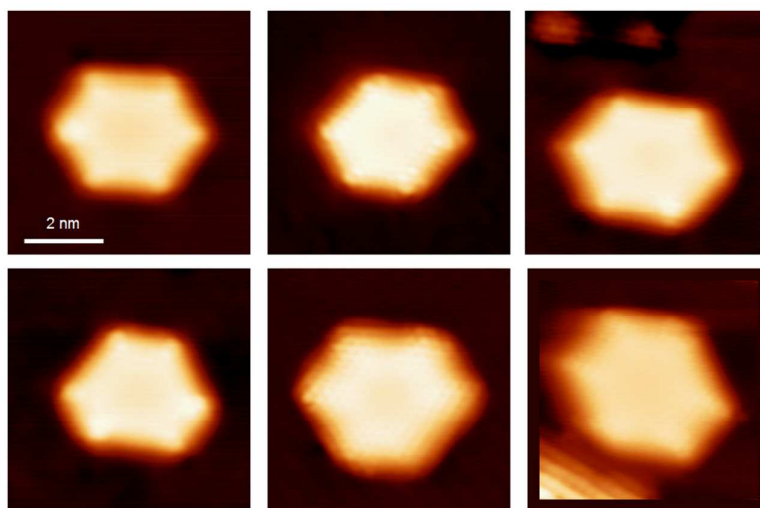

**Figure S1.** STM images of hexagonal-shaped GNs

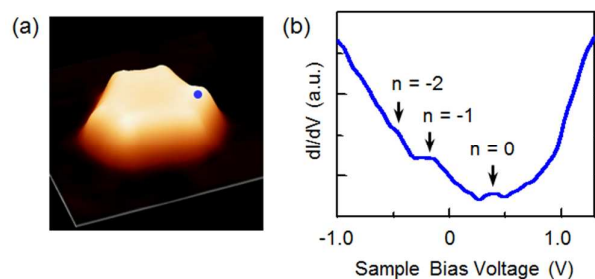

**Figure S2.** (a) STM image of the GN. (b) Differential conductance ( $dI/dV$ ) spectrum taken at the position indicated by the blue dot in (a).

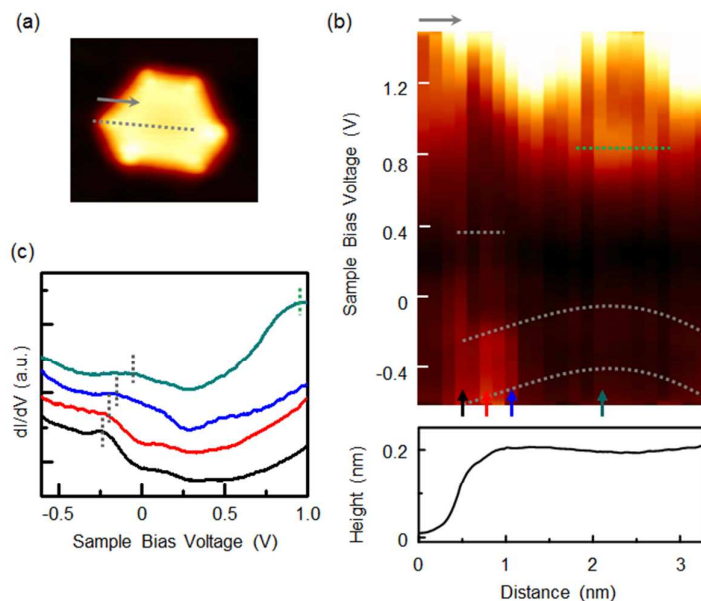

**Figure S3.** (a) STM image of the basin-shaped GN in Figure 5f. (b) Spatially resolved  $dI/dV$  spectra obtained along the line in (a). The dotted green and gray lines indicate the confined state and LLs, respectively. (c)  $dI/dV$  spectra obtained at the positions indicated by colored arrows in (b).

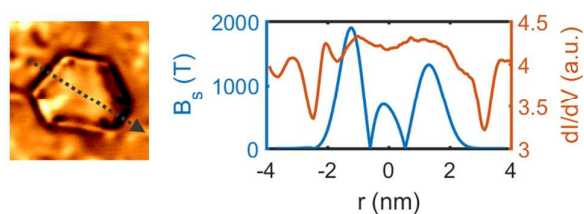

**Figure S4.** Line profile of the pseudo-magnetic field and  $dI/dV$  taken from Figure 4d and Figure 5g, respectively.

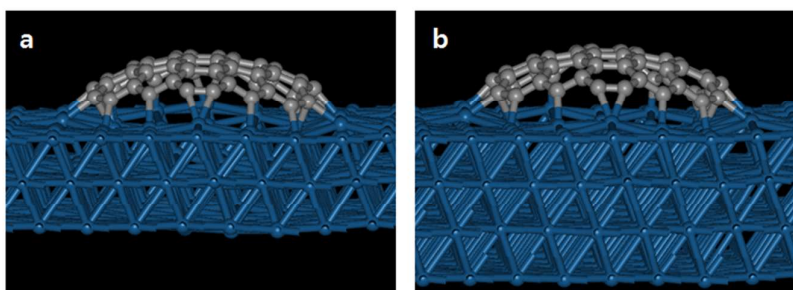

**Figure S5.** DFT-optimized structures of dome-shaped graphene nanoislands on (a) three and (b) four layers of Pt slab. Calculations were carried out with no frozen atoms.

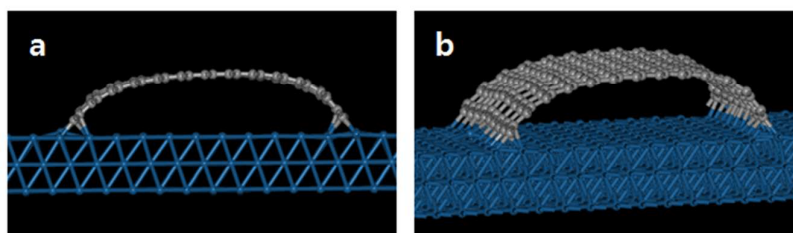

**Figure S6.** Graphene ribbon on Pt(111) shown in Figures 2c and d optimized with the standard version of the pseudopotential for carbon with a cutoff energy of 400.0 eV.

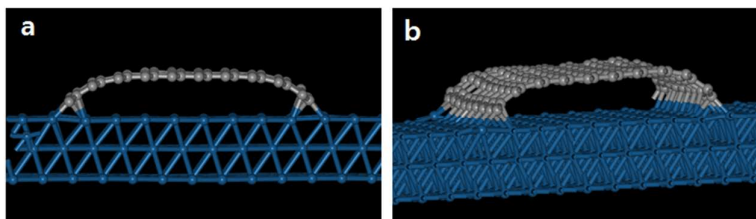

**Figure S7.** DFT-optimized structure of graphene ribbon on Pt(111) with dispersion corrections using the DFT-D3 method of Grimme *et al.*<sup>s1</sup> with Becke–Johnson damping.<sup>s2</sup>

## References

- (S1) Grimme, S.; Antony, J.; Ehrlich, S.; Krieg, H. A Consistent and Accurate *ab initio* Parametrization of Density Functional Dispersion Correction (DFT-D) for the 94 Elements H-Pu. *J. Chem. Phys.* **2010**, *132*, 154104
- (S2) Grimme, S.; Ehrlich, S.; Goerigk, L. Effect of the Damping Function in Dispersion Corrected Density Functional Theory. *J. Comp. Chem.* **2011**, *32*, 1456-1465.
